# Supplementary material
Source: MDPI journal article supplement (https://www.mdpi.com/2071-1050/15/16/12584)
Supplement: s1 [file s1]

Table S1. Construction dates of individual reef segments.

| Reef #    | Constructed |
|-----------|-------------|
| 1         | 6/28/2012   |
| 2-3       | 7/13/2012   |
| 4-6       | 7/27/2012   |
| 7-8       | 8/24/2012   |
| 9         | 10/24/2012  |
| 10        | 11/10/2012  |
| 11-12     | 12/8/2012   |
| 20-22     | 2/23/2013   |
| 13        | 4/10/2013   |
| 27-28     | 4/18/2013   |
| 24-26     | 6/1/2013    |
| 14        | 6/27/2013   |
| 15-17, 23 | 8/3/2013    |
| 18-19     | 9/2/2013    |

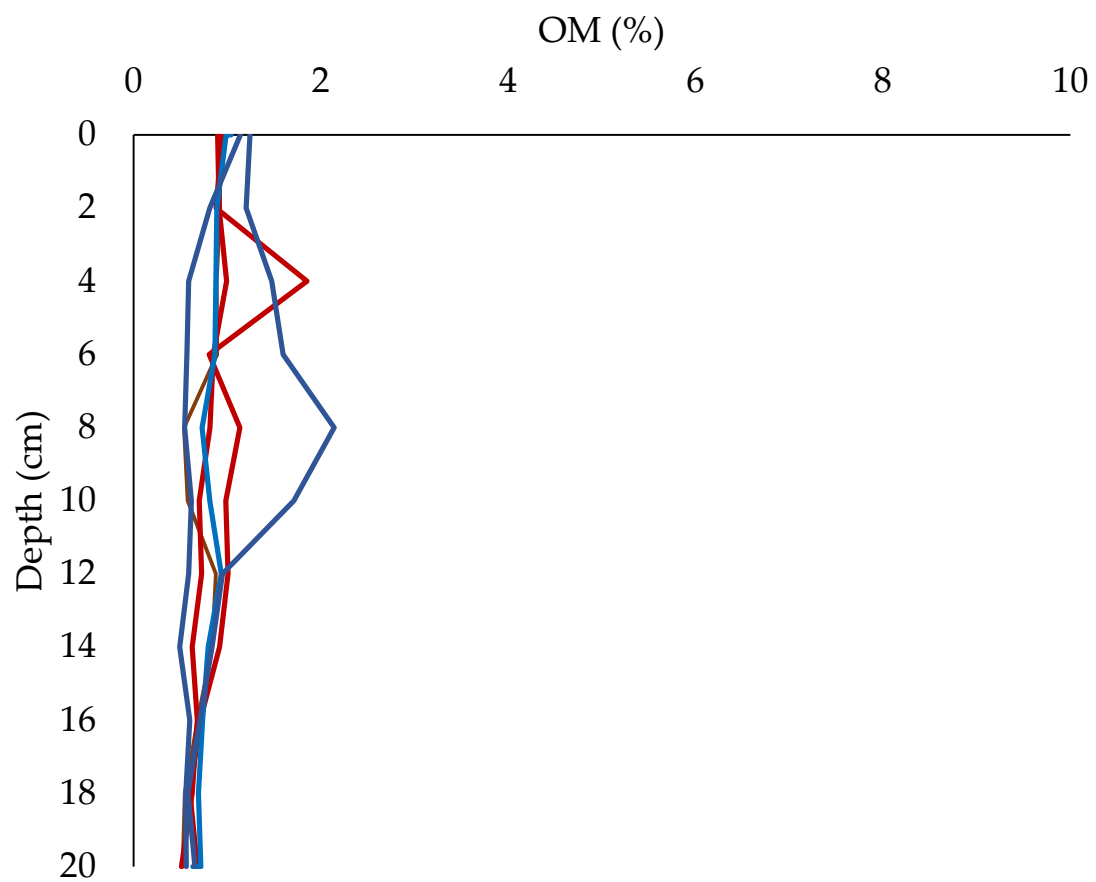

Figure S1. Vertical profile of sediment OM from cores in the control area, from 2016 (blue) and 2020 (red.)
